# Supplementary material for: Large Gender Gap in Oral Hygiene Behavior and Its Impact on Gingival Health in Late Adolescence
Source: PubMed Central journal article supplement (PMC7345042; doi:10.3390/ijerph17124394), 2020-06-18
Supplement: ijerph-17-04394-s001.pdf [file ijerph-17-04394-s001.pdf]

**Frequency of brushing**

*How many times do you brush a day? Please choose one of the following options.*

|                          |                 |
|--------------------------|-----------------|
| <input type="checkbox"/> | 0               |
| <input type="checkbox"/> | 1 time          |
| <input type="checkbox"/> | 2 times         |
| <input type="checkbox"/> | 3 times         |
| <input type="checkbox"/> | 4 times or more |

**Duration of brushing**

*How long do you brush each time? Please choose one from the following options.*

|                          |                 |
|--------------------------|-----------------|
| <input type="checkbox"/> | less than 1 min |
| <input type="checkbox"/> | 1min            |
| <input type="checkbox"/> | 2 – 3 min       |
| <input type="checkbox"/> | 4 – 5 min       |
| <input type="checkbox"/> | 6 min or more   |
